# Supplementary material
Source: Springer Nature journal article supplement (https://www.springermedizin.de/resource/supplementary/12889_2014_6920_MOESM2_ESM.pdf/9499300)
Supplement: MOESM2 [file 9499300]

Favors  
Non-Contingency Management

Favors  
Contingency Management

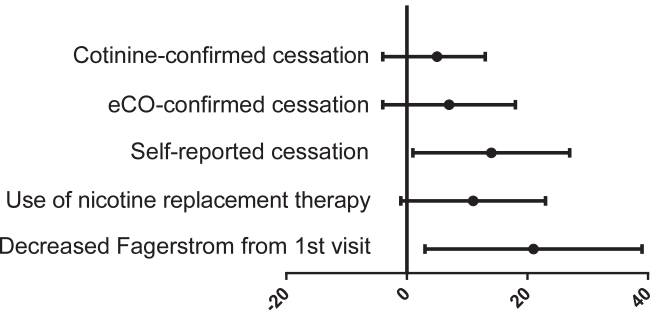

Difference in % of Participants  
Reporting Outcome at 6-months
